# Supplementary material for: Self-assembled morphology of tripod nanoparticle solutions: the effect of arm length and hydrophobic ratio
Source: Royal Society of Chemistry journal article supplement (doi:10.1039/c7me00135e), 2018-01-01
Supplement: c7me00135e1.pdf [file c7me00135e1.pdf]

## Support Information –

### (a) Effect of the HR

Non-ordered (HR = 0.0%)

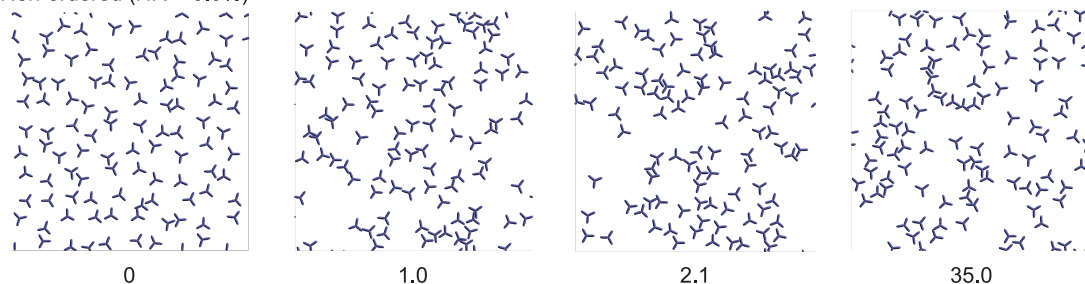

Kagome structure (HR = 31.9%)

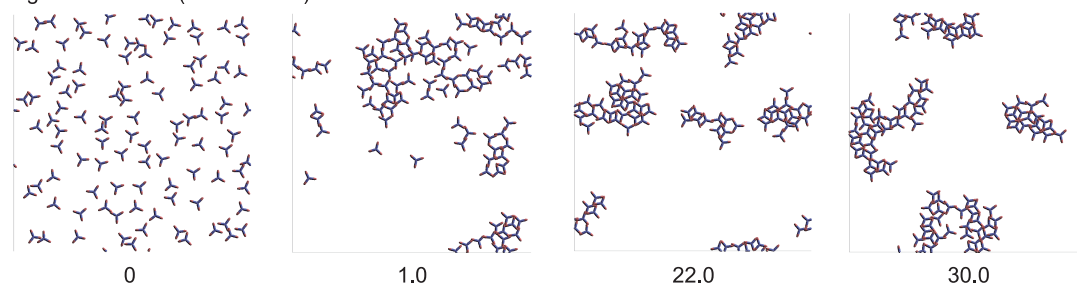

Non-kagome structure (HR = 44.2%)

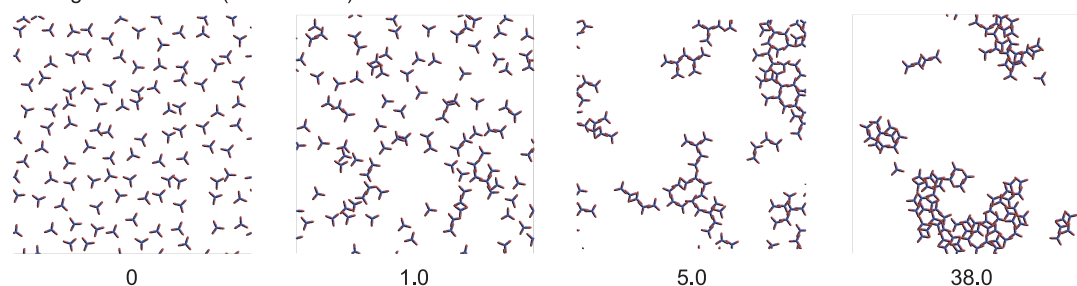

Simulation time [ $\tau$ ],  $\times 10^3$

(b) Effect of the AL

Linear structure (AL = 2.3 nm)

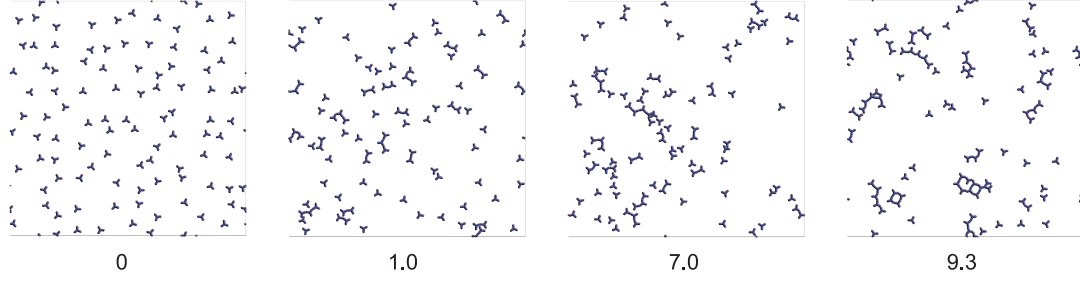

Non-kagome structure (AL = 4.3 nm)

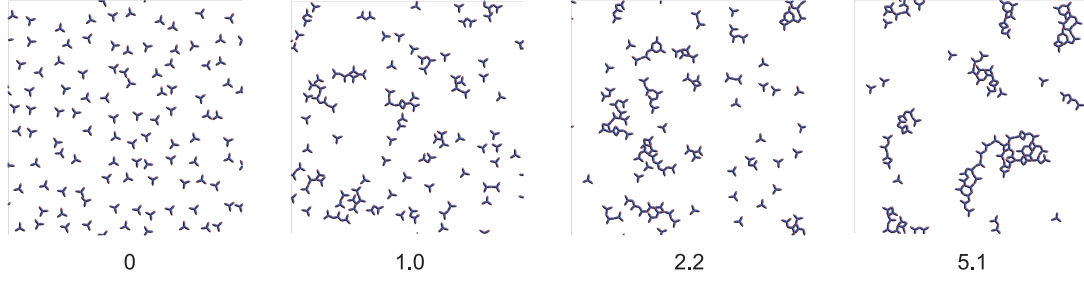

Kagome structure (AL = 4.5 nm)

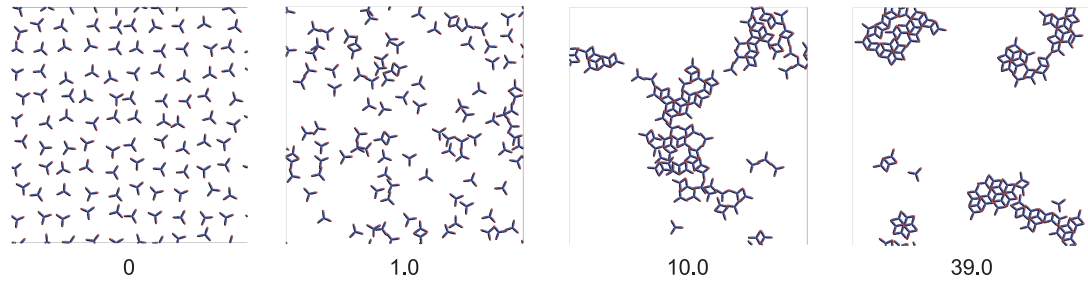

Simulation time [ $\tau$ ],  $\times 10^3$

Fig. S1 Representative snapshots of self-assembly process for the whole simulation box. (a) As for the effect of HR, three characteristic phases, a non-ordered phase, a kagome structure phase, and a non-kagome structure phase, were observed in the nanoslit. (b) As for the effect of AL, three characteristic phases including a linear-structure phase, a non-kagome structure phase, and the kagome structure phase, depending on the value of AL.
